# Supplementary material for: Carbon dots derived from metformin by electrochemical synthesis with broad-spectrum antibacterial properties
Source: Royal Society of Chemistry journal article supplement (doi:10.1039/d3tb02442c), 2024-01-01
Supplement: d3tb02442c1.pdf [file d3tb02442c1.pdf]

## Supporting Information

### Metformin derived carbon dots by electrochemical synthesis with broad-spectrum antibacterial property

Xin Du,<sup>a</sup> Mengling Zhang,<sup>\*ab</sup> Yurong Ma,<sup>a</sup> Yan Zhang,<sup>a</sup> Wenwen Li,<sup>a</sup> Tao Hu,<sup>a</sup> Yang Liu,<sup>\*a</sup> Hui Huang,<sup>\*a</sup>  
Zhenhui Kang,<sup>ab</sup>

<sup>a</sup> *Institute of Functional Nano and Soft Materials Laboratory (FUNSOM), Jiangsu Key Laboratory for Carbon-Based  
Functional Materials & Devices, Soochow University, Suzhou 215123, Jiangsu, China.*

<sup>b</sup> *Macao Institute of Materials Science and Engineering (MIMSE), MUST-SUDA Joint Research Center for Advanced  
Functional Materials, Macau University of Science and Technology, Taipa 999078, Macao, China.*

E-mail: Mengling Zhang, [menglingzhang326@163.com](mailto:menglingzhang326@163.com);

Yang Liu, [yangl@suda.edu.cn](mailto:yangl@suda.edu.cn);

Hui Huang, [hhuang0618@suda.edu.cn](mailto:hhuang0618@suda.edu.cn).

## Supplementary Figures

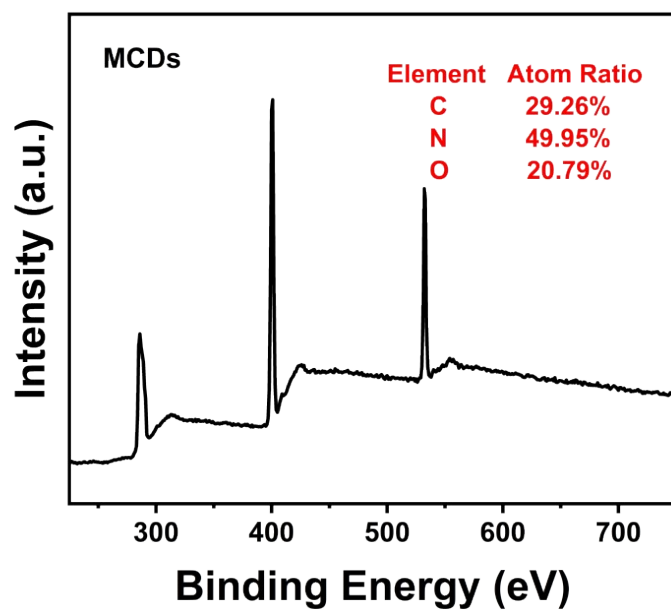

Figure S1. The XPS full-scan spectrum of MCDs.

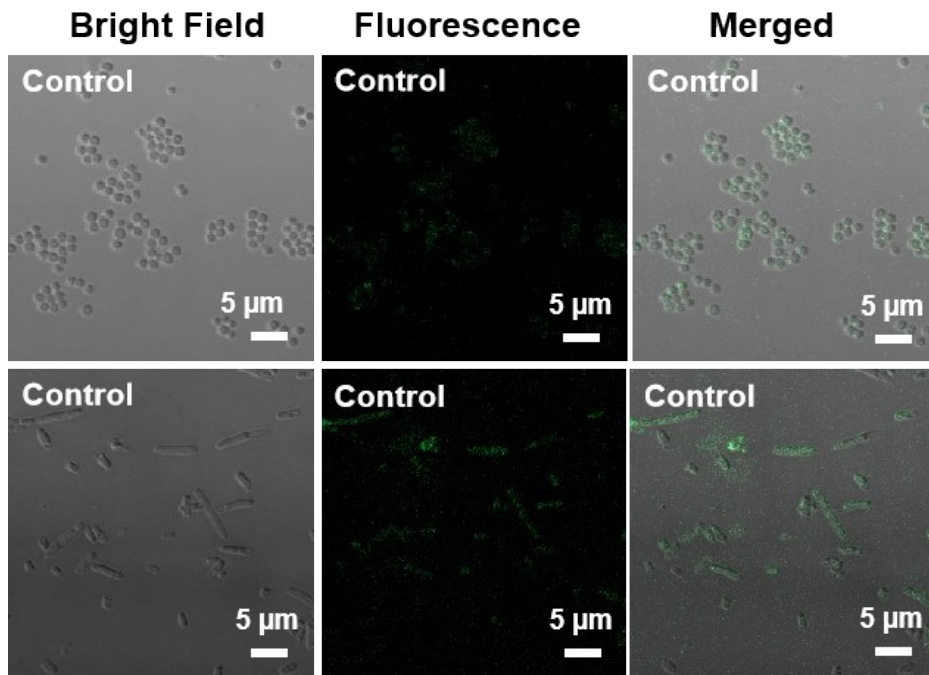

**Figure S2.** The CLSM images of control group for semi-quantitative analysis of ROS content ( $\lambda_{ex}=488$  nm).
